# Supplementary material for: Synthetic pores with sticky π-clamps
Source: Royal Society of Chemistry journal article supplement (doi:10.1039/b702255g), 2007-01-01
Supplement: b702255g.pdf [file b702255g.pdf]

## Synthetic Pores with Sticky $\pi$ -Clamps

Hiroyuki Tanaka, Guillaume Bollot, Jiri Mareda, Svetlana Litvinchuk, Duy-Hien Tran,  
Naomi Sakai and Stefan Matile

<sup>1</sup>*Department of Organic Chemistry, University of Geneva, Geneva, Switzerland.*

stefan.matile@chiorg.unige.ch

### Supporting Online Material

**1. Materials and Methods.** As in (S1), (S2) or (S3), Supporting Information. CF was from Fluka/Aldrich, EYPC from Avanti Polar Lipids, ANTS/DPX from Molecular Probes, all buffers, HEPES, MES, TES, Tris and inorganic salts were of the best grade available from Sigma. Triton X-100 and nucleotides were from Sigma. Large unimellar vesicles (LUVs) were prepared by the Mini-Extruder with polycarbonate membrane, pore size 100 nm, from Avanti Polar Lipids. Fluorescence spectra were recorded on either a Fluoromax 2 or Fluoromax 3 from Jobin Yvon-Spex equipped with an injector port, a magnetic stirrer and a temperature controller (25 °C). Planar bilayer conductance was measured on a bilayer apparatus (BCH-13, Warner) in a vibration isolated Faraday cage (house-made) with a bilayer clamp amplifier (BC-525c, Warner), low-pass filtered with a 8-pole Bessel filter (LPF-8, Warner), converted (DigiData 1200, Axon) and analyzed by computer (pClamp 8.0, Axon and QuB Software Suite, State University of New York).

**Abbreviations.** ADP: Adenosine 5'-diphosphate; AMP: Adenosine 5'-monophosphate; AMPSO: 1-([4-Amino-2-propyl-5-pyrimidinyl]methyl)-2-methylpyridinium chloride; ANTS: 8-aminonaphthalene-1,3,6-trisulfonate; ATP: Adenosine 5'-triphosphate; CDP: Cytidine 5'-diphosphate; CF, 5(6)-carboxyfluorescein; DAN: 1,5-Dialkoxynaphthalene; DMF: *N,N*-Dimethylformamide; DMSO: Dimethylsulfoxide; DPX: *p*-xylenebis(pyridinium)bromide; EYPC LUVs: Egg yolk phosphatidylcholine large unilamellar vesicles; GDP: Guanosine 5'-diphosphate; *Gla, G*: Glycolate, -OCH<sub>2</sub>CO- (hydroxyglycine); GMP: Guanosine 5'-monophosphate; GTP: Guanosine 5'-triphosphate; HEPES: N-(2-hydroxyethyl)piperazine-N'-(2-ethanesulfonic acid); His, H: *L*-Histidine; Leu, L: *L*-Leucine; Lys, K: *L*-Lysine; MES: 2-Morpholinoethanesulfonic acid monohydrate; NDI: 1,4,5,8-Naphthalenediimide; Ndi,  $\pi_A$ : Artificial amino acid in pore **2**; TES: *N*-[Tris(hydroxymethyl)methyl]-2-aminoethanesulfonic acid; Tris: Tris(hydroxymethyl)aminomethane; UDP: Uridine 5'-diphosphate.

## 2. Supporting Text

### 2.1. Syntheses

#### **1<sup>3</sup>,2<sup>3</sup>,3<sup>2</sup>,4<sup>3</sup>,5<sup>2</sup>,6<sup>3</sup>,7<sup>2</sup>,8<sup>3</sup>-Octakis(*Gla*-Leu-Lys-Leu-His-Leu-NH<sub>2</sub>)-*p*-Octiphenyl 1<sup>m</sup>.**

Monomer **1<sup>m</sup>** for self-assembly into pore **1** was prepared in 19 steps following previously reported procedures (*S1*).

#### **1<sup>3</sup>,2<sup>3</sup>,3<sup>2</sup>,4<sup>3</sup>,5<sup>2</sup>,6<sup>3</sup>,7<sup>2</sup>,8<sup>3</sup>-Octakis(*Gla*-Leu-Ndi-Leu-Lys-Leu-NH<sub>2</sub>)-*p*-Octiphenyl 4.**

Monomer **4** for self-assembly into pore **2** was prepared in 24 steps as outlined in Scheme 1 following previously reported procedures (*S2*).

**DAN Hydrazide 5.** Hydrazide **5** was prepared in 2 steps as outlined in Scheme 2 following previously reported procedures (S2).

**NDI Hydrazide 16.** Hydrazide **16** was prepared in 4 steps as outlined in Scheme 2 following previously reported procedures (S2).

## **2.2 Vesicle Preparation**

**2.2.1. EYPC-LUVs  $\supset$  ANTS/DPX.** As in ref (S1). Solutions of EYPC (25 mg) in  $\text{CHCl}_3/\text{MeOH}$  1:1 (1 ml) were dried under a stream of nitrogen and then under vacuum ( $>2$  h) to form thin films. The resulting films were hydrated with 1 ml buffer (12.5 mM ANTS, 45.0 mM DPX, 5 mM TES, 20 mM NaCl, pH 7.0) for more than 30 min, subjected to freeze-thaw cycles (5x) and extrusions (15x, Mini-Extruder with a polycarbonate membrane, pore size 100 nm). Extravesicular ANTS and DPX were removed by gel filtration (Sephadex G-50) with 10 mM TES, 100 mM NaCl, pH 7.0. The LUV fractions were combined and diluted to 6 ml with the corresponding buffer. Lipid concentrations were estimated from the amount of entrapped dye; the estimated values were consistent with earlier results from phosphate analysis. The final stock solutions had the following characteristics:  $\sim 2.5$  mM EYPC; inside: 12.5 mM ANTS, 45.0 mM DPX, 5 mM TES, 20 mM NaCl, pH 7.0; outside: 10 mM TES, 100 mM NaCl, pH 7.0.

**2.2.2. EYPC-LUVs $\Delta$ CF.** As in refs (S1) or (S4). Solutions of EYPC (25 mg) in  $\text{CHCl}_3/\text{MeOH}$  1:1 (1 ml) were dried under a stream of nitrogen and then under vacuum (>2 h) to form thin films. The resulting films were hydrated with 1 ml

- a) “low-ionic-strength” buffer “+” (50 mM CF, 10 mM HEPES, 10 mM NaCl, pH 7.4) for (+)-EYPC-LUVs $\Delta$ CF, Fig. 6, ●),
- b) “intermediate-ionic-strength” buffer “+” (50 mM CF, 10 mM HEPES, 100 mM NaCl, pH 7.4) for (++)-EYPC-LUVs $\Delta$ CF, Fig. 6, ○) or
- c) “high-ionic-strength” buffer “+” (50 mM CF, 10 mM HEPES, 200 mM NaCl, pH 7.4) for (+++)-EYPC-LUVs $\Delta$ CF, Fig. 6, □)

for more than 30 min, subjected to freeze-thaw cycles (5x) and extrusions (15x, Mini-Extruder with a polycarbonate membrane, pore size 100 nm). Extravesicular CF was removed by gel filtration (Sephadex G-50) with

- a) buffer “+” (107 mM NaCl, 10 mM HEPES, pH 7.4) for (+)-EYPC-LUVs $\Delta$ CF, Fig. 6, ●)
- b) buffer “++” (200 mM NaCl, 10 mM HEPES, pH 7.4) for (++)-EYPC-LUVs $\Delta$ CF, Fig. 6, ○), or
- c) buffer “+++” (300 mM NaCl, 10 mM HEPES, pH 7.4) for (+++)-EYPC-LUVs $\Delta$ CF, Fig. 6, □).

The LUV fractions were combined and diluted to 6 ml with the corresponding buffer. Lipid concentrations were estimated from the amount of entrapped dye; the estimated values were consistent with earlier results from phosphate analysis. The final stock solutions had the following characteristics:

- a) (+)-EYPC-LUVs $\Delta$ CF, Fig. 6, ●: ~2.5 mM EYPC; *inside*, 50 mM CF, 10 mM NaCl, 10 mM HEPES, pH 7.4; *outside*, 107 mM NaCl, 10 mM HEPES, pH 7.4,

- b) (++)-EYPC-LUVs  $\supset$  CF, Fig. 6,  $\circ$ :  $\sim 2.5$  mM EYPC; *inside*, 50 mM CF, 100 mM NaCl, 10 mM HEPES, pH 7.4; *outside*, 200 mM NaCl, 10 mM HEPES, pH 7.4,
- c) (+++)-EYPC-LUVs  $\supset$  CF, Fig. 6,  $\square$ :  $\sim 2.5$  mM EYPC; *inside*, 50 mM CF, 200 mM NaCl, 10 mM HEPES, pH 7.4; *outside*, 300 mM NaCl, 10 mM HEPES, pH 7.4.

### 2.3 Pore Activity, pH Profile (ANTS/DPX assay)

EYPC-LUVs  $\supset$  ANTS/DPX (100  $\mu$ l) were added to gently stirred, thermostated buffer (1.90 ml, 100 mM NaCl, 10 mM buffer: MES (pH = 4.5  $\sim$  6.5), HEPES (pH = 6.0  $\sim$  8.0), or AMPSO (pH = 8.0  $\sim$  10.0)) in a fluorescence cuvette. Fluorescence emission intensity  $I_t$  ( $\lambda_{em} = 520$  nm,  $\lambda_{ex} = 353$  nm) was monitored as a function of time ( $t$ ) during addition of 20  $\mu$ l **4** (200 nM final concentration) and, after 5 min, 40  $\mu$ l 1.2% aq triton X-100. Fluorescence kinetics were normalized to fractional intensity  $Y_t$  applying equation [S1]

$$Y_t = [(I_t - I_0) / (I_\infty - I_0)] / [(I_t^{MAX} - I_0) / (I_\infty - I_0)] \quad [S1],$$

where  $I_0 = I_t$  at pore addition,  $I_\infty = I_t$  at saturation after lysis, and  $I_t^{MAX} = I_t$  at maximal emission intensity before lysis. From the obtained curves,  $Y_{MAX} = Y_t$  at maximal fractional emission intensity before lysis was obtained for each measurement and converted into fractional pore activity  $Y$  applying equation [S2]

$$Y = [(Y_{MAX} - Y_{MAX(0)}) / (Y_{MAX(\infty)} - Y_{MAX(0)})] \quad [S2],$$

where  $Y_{MAX(0)}$  is  $Y_{MAX}$  obtained under the conditions giving rise to lowest pore activity and  $Y_{MAX(\infty)}$  is  $Y_{MAX}$  of the highest activity (= 1). The obtained fractional pore activities  $Y$  were plotted as a function of pH (Fig. 5).

#### 2.4. Pore Activity, Hill Plot (CF assay)

(+)-, (++)-, or (+++)-EYPC-LUVs $\Delta$ CF (100  $\mu$ l from above stock solutions) were added to gently stirred, thermostated buffer (1.90 ml) in a fluorescence cuvette [pH 6.5, 107 (+), 200 (++) or 300 mM NaCl (+++), 10 mM HEPES]. Fluorescence emission intensity  $F_t$  ( $\lambda_{ex}$  492 nm,  $\lambda_{em}$  517 nm) was monitored as a function of time during addition of monomer 4 (20  $\mu$ l of 0 - 250  $\mu$ M stock solution, compare Fig. 6) and 40  $\mu$ l 1.2% aq triton X-100 for final calibration. Fractional pore activity  $Y$  was determined as described in 2.3, plotted as a function of monomer concentration  $c_M$  and fitted to the Hill equation [S3] applied to self-assembly

$$Y = Y_{\infty} + (Y_0 - Y_{\infty}) / \{1 + (c_M / EC_{50})^n\} \quad [S3],$$

where  $Y_0$  is  $Y$  without pore,  $Y_{\infty}$  is  $Y$  with excess pore,  $EC_{50}$  the concentration for 50% pore activity and  $n$  the Hill coefficient.

#### 2.5. Pore Blockage

(+)- or (++)-EYPC-LUVs $\Delta$ CF (100  $\mu$ l from above stock solutions) were added to gently stirred, thermostated buffer (1.90 ml) in a fluorescence cuvette [pH 6.5, 107 (+) or 200 mM

NaCl (++) , 10 mM HEPES]. Fluorescence emission intensity  $F_t$  ( $\lambda_{\text{ex}}$  492 nm,  $\lambda_{\text{em}}$  517 nm) was monitored as a function of time during addition of blockers (nucleotides etc, see Fig. 9, Tab. 1 and Tab. 2; 20  $\mu\text{l}$  of concentrated stock solutions, for final concentrations, see Fig. 9, Tab. 1 and Tab. 2), pore **1** or **2** (20  $\mu\text{l}$  stock solution, usually 200 nM final monomer concentration) and 40  $\mu\text{l}$  1.2% aq triton X-100 for final calibration. Fractional pore activity  $Y$  was determined as described in 2.3, plotted as a function of blocker concentration  $c_{\text{BLOCKER}}$  and fitted to the Hill equation [S4] applied to self-assembly

$$Y = Y_{\infty} + (Y_0 - Y_{\infty}) / \{1 + (c_{\text{BLOCKER}} / IC_{50})^n\} \quad [\text{S4}],$$

where  $Y_0$  is  $Y$  without blocker,  $Y_{\infty}$  is  $Y$  with excess blocker,  $IC_{50}$  the concentration for 50% pore blockage and  $n$  the Hill coefficient.

## 2.6. Planar Bilayer Conductance

General procedures have been described in (S1) and (S3). In brief,  $n$ -decane containing EYPC (33 mg/ml) and monomer **4** (0.08 mol%) was painted on an orifice ( $d = 150 \mu\text{m}$ ) separating the two chambers of a planar bilayer cell. Measurements and analyses conditions are following. Symmetrical 2.0 M KCl; agar bridge with 2 M KCl; Ag / AgCl electrodes; holding potential as indicated; Bessel filter: 1 kHz; sampled at 10 kHz;  $25 \pm 1 \text{ }^{\circ}\text{C}$ .

## 3. Supporting References

- S1. S. Litvinchuk, G. Bollot, J. Mareda, A. Som, D. Ronan, M. R. Shah, P. Perrottet, N. Sakai and S. Matile, *J. Am. Chem. Soc.*, 2004, **126**, 10067-10075.
- S2. H. Tanaka, S. Litvinchuk, D.-H. Tran, G. Bollot, J. Mareda, N. Sakai and S. Matile, *J. Am. Chem. Soc.*, 2006, **128**, 16000-16001.
- S3. Y. Baudry, D. Pasini, M. Nishihara, N. Sakai and S. Matile, *Chem. Commun.*, 2005, **40**, 4798-4800.
- S4. S. Litvinchuk, N. Sordé and S. Matile, *J. Am. Chem. Soc.*, 2005, **127**, 9316-9317.
